# Supplementary material
Source: bioRxiv or medRxiv preprint supplement (https://www.biorxiv.org/highwire/filestream/2392/field_highwire_adjunct_files/0/009175-1.pdf)
Supplement: Supplementary file [file 009175-1.pdf]

| SNP        | Chrom | Position  | A1 | A2 | Rate<br>count | Sex | GC | Recipient<br>het | Other parent<br>het | Validation | SNP<br>density | Type               | CO<br>strand | HapMap2<br>rate | deCODE<br>rate | Hotspot<br>count |
|------------|-------|-----------|----|----|---------------|-----|----|------------------|---------------------|------------|----------------|--------------------|--------------|-----------------|----------------|------------------|
| rs4347199  | 1     | 118526592 | A  | G  | .5            | F   | N  | N                | N                   | TORSSGP    | L              | CO cluster         | A            | 1.829467        | 1.661154       | .5               |
| rs749003   | 1     | 118531980 | T  | C  | .5            | F   | Y  | Y                | N                   | TORSSGP    | L              | CO cluster         | B            | 0.581527        | 0.004318       | .5               |
| rs2226273  | 1     | 198097051 | A  | G  | 1             | M   | Y  | Y                | N                   | TORGP      | D              |                    |              | 5.240165        | 1.353777       | 1                |
| rs701164   | 1     | 230685255 | G  | A  | 1             | F   | Y  | N                | Y                   |            | D              |                    |              | 12.146157       | 16.102417      | 1                |
| rs11585647 | 1     | 247507887 | C  | T  | 1             | M   | Y  | N                | N                   | TORSSg     | D              |                    |              | 1.925585        | NA             | 1                |
| rs6717613  | 2     | 309480    | G  | A  | 1             | M   | N  | Y                | Y                   | TOGP       | D              |                    |              | 9.340856        | NA             | 1                |
| rs2113820  | 2     | 53355627  | G  | T  | 1             | M   | N  | Y                | N                   |            | D              |                    |              | 14.776747       | 3.618419       | 1                |
| rs10490193 | 2     | 66958804  | C  | A  | 1             | F   | Y  | N                | Y                   | OG         | D              |                    |              | 13.785664       | 11.949364      | 1                |
| rs7609111  | 2     | 76975383  | G  | A  | 1             | F   | N  | N                | N                   |            | L              | NCO cluster        |              | 3.091294        | 0.024092       | 1                |
| rs1517771  | 2     | 77014577  | T  | C  | 1             | F   | Y  | Y                | N                   |            | L              | NCO cluster, Tract |              | 3.997621        | 2.732152       | 0                |
| rs4853273  | 2     | 77018329  | G  | A  | 1             | F   | Y  | N                | N                   |            | L              | NCO cluster, Tract |              | 3.905728        | 3.876444       | 1                |
| rs716730   | 2     | 151429031 | G  | A  | 1             | M   | Y  | N                | N                   |            | L              |                    |              | 10.852501       | 3.227196       | 1                |
| rs13012540 | 2     | 200056608 | C  | T  | 1             | F   | Y  | N                | N                   | TORSSgP    | L              |                    |              | 0.127552        | 0.002142       | 1                |
| rs825282   | 2     | 222522255 | T  | C  | 1             | F   | Y  | N                | Y                   |            | D              |                    |              | 19.293358       | 18.972634      | 1                |
| rs13419630 | 2     | 228056218 | G  | A  | 1             | M   | Y  | Y                | Y                   |            | D              |                    |              | 18.369565       | 37.093293      | 1                |
| rs4663310  | 2     | 239480335 | C  | A  | 1             | F   | Y  | N                | N                   |            | D              |                    |              | 4.155929        | 0.823188       | 1                |
| rs2975748  | 2     | 241518989 | G  | A  | 1             | M   | Y  | N                | N                   | TSP        | D              |                    |              | 2.488724        | NA             | 1                |
| rs787837   | 3     | 9727675   | T  | C  | 1             | M   | Y  | Y                | N                   | TOGP       | D              |                    |              | 1.202195        | 0.081819       | 1                |
| rs9881117  | 3     | 123702960 | A  | G  | 0             | F   | N  | N                | Y                   |            | D              |                    |              | 1.608192        | 1.309069       | 1                |
| rs10936761 | 3     | 173323691 | A  | C  | 1             | F   | Y  | Y                | N                   |            | L              |                    |              | 1.208924        | 1.897151       | 1                |
| rs13105678 | 4     | 40260379  | A  | C  | 1             | F   | N  | N                | Y                   | ORssGP     | D              |                    |              | 2.541384        | 3.999018       | 1                |
| rs1352437  | 4     | 84755196  | T  | G  | 1             | F   | Y  | N                | N                   |            | L              |                    |              | 7.778375        | 3.931610       | 1                |
| rs4148149  | 4     | 89062285  | A  | C  | 1             | F   | N  | N                | N                   |            | D              | Tract              |              | 2.401212        | 1.356051       | 1                |
| rs13137622 | 4     | 89062513  | G  | T  | 1             | F   | Y  | N                | N                   |            | D              | Tract              |              | 2.420062        | 1.368195       | 0                |
| rs12509302 | 4     | 152164786 | G  | A  | 1             | M   | Y  | N                | N                   |            | D              |                    |              | 4.290054        | 1.586734       | 1                |
| rs2625249  | 4     | 156519123 | G  | A  | 0             | M   | N  | N                | Y                   | TOSgP      | D              |                    |              | 12.050109       | 14.609979      | 1                |
| rs12640997 | 4     | 190245038 | C  | T  | 1             | M   | Y  | N                | Y                   | TOGP       | D              |                    |              | 0.853191        | NA             | 1                |
| rs91315    | 5     | 1855301   | A  | G  | 1             | F   | Y  | N                | Y                   | TORSSGP    | L              |                    |              | 4.948984        | NA             | 1                |
| rs293102   | 5     | 4632694   | C  | T  | 1             | F   | Y  | N                | Y                   |            | L              |                    |              | 16.604299       | 9.192664       | 1                |
| rs6877265  | 5     | 108634128 | T  | G  | 1             | F   | Y  | Y                | Y                   | No call    | L              |                    |              | 18.718147       | 35.380079      | 1                |
| rs1051643  | 5     | 126171999 | C  | T  | 0             | F   | Y  | N                | Y                   | TRgP       | D              | Tract              |              | 1.337151        | 0.309420       | 1                |
| rs1051644  | 5     | 126172195 | T  | C  | 0             | F   | N  | N                | Y                   | TRgP       | D              | Tract              |              | 1.360362        | 0.309420       | 0                |
| rs7706554  | 5     | 171552219 | C  | T  | .5            | F   | Y  | N                | N                   | TORG       | D              | CO cluster, Tract  | A            | 3.909591        | 8.143745       | .5               |
| rs2279515  | 5     | 171553833 | A  | G  | .5            | F   | N  | N                | N                   | TORG       | D              | CO cluster, Tract  | A            | 3.898081        | 7.971111       | 0                |
| rs2029523  | 5     | 171554516 | T  | C  | .5            | F   | Y  | Y                | N                   | TORG       | D              | CO cluster, Tract  | B            | 3.885133        | 7.898057       | .5               |
| rs882328   | 5     | 171554880 | A  | G  | .5            | F   | Y  | Y                | N                   | TORG       | D              | CO cluster, Tract  | B            | 3.878211        | 7.859124       | 0                |

|            |    |           |   |   |    |   |   |   |   |         |   |                    |           |           |          |    |
|------------|----|-----------|---|---|----|---|---|---|---|---------|---|--------------------|-----------|-----------|----------|----|
| rs2913851  | 5  | 177675217 | G | A | 1  | F | N | Y | N |         | D |                    | 1.200900  | 0.085199  | 1        |    |
| rs1994124  | 6  | 2509443   | A | G | 1  | F | N | Y | Y |         | L |                    | 14.564878 | NA        | 1        |    |
| rs4305775  | 6  | 3296997   | T | G | 1  | M | N | N | N | TOSGP   | D | Tract              | 14.553147 | 21.820716 | 1        |    |
| rs9378359  | 6  | 3297021   | G | A | 1  | M | Y | N | N | TOSGP   | D | Tract              | 14.553271 | 21.844996 | 0        |    |
| rs4305776  | 6  | 3297090   | T | C | 1  | M | Y | Y | N | TOSGP   | D | Tract              | 14.553628 | 21.914803 | 0        |    |
| rs3812205  | 6  | 16699949  | C | T | 1  | M | Y | N | N |         | D | NCO cluster        | 5.723190  | 11.130449 | 1        |    |
| rs13219866 | 6  | 16705542  | T | G | 1  | M | N | Y | Y |         | D | NCO cluster, Tract | 16.458242 | 17.295359 | 1        |    |
| rs666215   | 6  | 16705651  | A | C | 1  | M | Y | Y | N |         | D | NCO cluster, Tract | 16.457963 | 17.198613 | 0        |    |
| rs532735   | 6  | 16706171  | G | A | 1  | M | N | Y | N |         | D | NCO cluster, Tract | 16.441753 | 16.734659 | 0        |    |
| rs2844670  | 6  | 31005726  | T | C | 1  | F | Y | Y | N |         | L |                    | 1.412231  | 1.003082  | 1        |    |
| rs3818685  | 6  | 44280281  | A | G | 1  | F | Y | Y | N | TORSSgP | L |                    | 1.920553  | 4.999843  | 1        |    |
| rs851871   | 6  | 67102718  | A | G | 1  | F | Y | N | N |         | D |                    | 1.960590  | 1.567021  | 1        |    |
| rs4708055  | 6  | 74167981  | A | C | 1  | F | Y | Y | N |         | D |                    | 0.717261  | 0.650717  | 1        |    |
| rs9480861  | 6  | 108858460 | C | T | 1  | F | Y | N | N |         | L |                    | 5.972521  | 4.543918  | 1        |    |
| rs197459   | 6  | 143083978 | A | G | 1  | F | N | Y | Y | TORGP   | D |                    | 15.424001 | 3.187097  | 1        |    |
| rs3924019  | 7  | 511203    | G | A | 1  | M | N | N | N | ORG     | D |                    | 1.496915  | NA        | 1        |    |
| rs10278217 | 7  | 22254262  | G | A | 1  | M | Y | N | N |         | D |                    | 3.428370  | 9.050305  | 1        |    |
| rs2519601  | 7  | 93364984  | C | A | .5 | M | Y | Y | N | TORSSgP | L | CO cluster         | A         | 0.202363  | 0.042675 | .5 |
| rs2677071  | 7  | 93387256  | G | A | .5 | M | N | N | N | TORSgP  | L | CO cluster         | B         | 0.001408  | 0.042675 | .5 |
| rs6963030  | 7  | 146791213 | A | G | 1  | F | Y | Y | Y | TRSSGP  | D |                    | 20.470011 | 8.677746  | 1        |    |
| rs19334    | 8  | 9009906   | T | C | 1  | F | Y | Y | N |         | L |                    | 0.960889  | 0.370120  | 1        |    |
| rs850429   | 8  | 16877472  | A | G | 1  | M | N | Y | Y |         | D |                    | 22.016981 | 28.827977 | 1        |    |
| rs13252794 | 8  | 22921931  | T | C | .5 | F | Y | Y | N | TOGP    | D | CO cluster         | A         | 1.198158  | 1.972554 | .5 |
| rs11135693 | 8  | 22925154  | C | A | .5 | F | Y | N | N | TOGP    | D | CO cluster, Tract  | B         | 1.145507  | 1.213649 | .5 |
| rs11135694 | 8  | 22925515  | A | G | .5 | F | N | N | N | TOGP    | D | CO cluster, Tract  | B         | 1.129192  | 1.130358 | 0  |
| rs1531746  | 8  | 32119175  | T | C | 1  | M | Y | N | N | TOG     | D |                    | 9.873400  | 8.708522  | 1        |    |
| rs6998933  | 8  | 38808752  | G | A | 1  | F | Y | N | Y | ORS     | D |                    | 14.032842 | 25.710011 | 1        |    |
| rs2513925  | 8  | 103701666 | A | G | .5 | F | Y | N | Y |         | D | CO cluster         | A         | 2.506383  | 1.583796 | .5 |
| rs2513926  | 8  | 103704496 | T | C | .5 | F | Y | Y | N |         | D | CO cluster         | B         | 3.281211  | 1.583796 | .5 |
| rs12676425 | 8  | 143413857 | A | C | 1  | F | Y | Y | N | TORSSg  | D |                    | 0.530126  | 0.967863  | 1        |    |
| rs2148358  | 9  | 7385564   | C | T | 1  | F | N | Y | N |         | L |                    | 14.170579 | 10.412837 | 1        |    |
| rs7855661  | 9  | 9499674   | C | T | 1  | M | Y | Y | Y |         | D |                    | 3.323471  | 6.238951  | 1        |    |
| rs1591033  | 9  | 21423394  | A | G | 1  | F | Y | Y | N |         | D |                    | 2.243674  | 1.899696  | 1        |    |
| rs10904103 | 10 | 3872876   | C | T | 1  | M | N | N | Y | TORSSG  | D |                    | 31.831424 | 48.114509 | 1        |    |
| rs2768716  | 10 | 14818820  | A | G | 1  | F | N | Y | Y |         | L |                    | 16.400510 | 12.782121 | 1        |    |
| rs2298126  | 10 | 16558985  | C | A | 0  | F | Y | N | Y | TORSSgP | L |                    | 3.288349  | 1.185007  | 1        |    |
| rs11192073 | 10 | 106216467 | A | C | 1  | F | N | N | N |         | D |                    | 0.831668  | 0.925138  | 1        |    |
| rs1393957  | 11 | 19172911  | T | C | 1  | F | Y | Y | N | TORSSg  | D |                    | 0.569770  | 0.027468  | 1        |    |
| rs12223676 | 11 | 69907249  | C | T | 1  | F | N | N | Y |         | D |                    | 11.884855 | 3.087553  | 1        |    |

|            |    |           |   |   |    |   |   |   |   |         |   |                    |           |           |    |    |
|------------|----|-----------|---|---|----|---|---|---|---|---------|---|--------------------|-----------|-----------|----|----|
| rs1215047  | 11 | 75759378  | A | C | 1  | F | N | N | N | xtOGP   | D |                    | 0.019100  | 0.013225  | 1  |    |
| rs10047441 | 11 | 99815753  | G | A | 1  | M | Y | N | N |         | L |                    | 1.494012  | 0.250427  | 1  |    |
| rs10895115 | 11 | 101352427 | T | G | 1  | M | N | Y | Y | TORs    | D |                    | 4.307756  | 0.116715  | 1  |    |
| rs740355   | 12 | 1723228   | C | T | 1  | M | Y | N | Y | TOSgP   | D |                    | 2.065905  | NA        | 1  |    |
| rs640814   | 12 | 4069521   | G | A | 1  | M | Y | Y | N | ORss    | D |                    | 24.430140 | 24.103302 | 1  |    |
| rs10492181 | 12 | 5749363   | T | C | 1  | M | Y | Y | N | TORSSG  | D |                    | 19.356655 | 24.479922 | 1  |    |
| rs1956328  | 14 | 48306780  | T | C | 1  | F | Y | N | N |         | L |                    | 3.287131  | 2.988853  | 1  |    |
| rs9888717  | 15 | 23755449  | G | A | 1  | F | Y | Y | N | TOSGP   | D | Tract              | 9.981170  | NA        | 1  |    |
| rs1405186  | 15 | 23755713  | G | A | 1  | F | Y | Y | N | TOSGP   | D | Tract              | 10.042265 | NA        | 0  |    |
| rs12901610 | 15 | 85465873  | G | A | 1  | F | Y | N | N |         | L |                    | 3.774357  | 2.017862  | 1  |    |
| rs11857443 | 15 | 100729706 | G | A | 1  | M | Y | N | N |         | D |                    | 2.460175  | NA        | 1  |    |
| rs4419043  | 15 | 100745680 | G | A | 1  | F | Y | Y | Y | TSSGP   | L |                    | 29.633471 | NA        | 1  |    |
| rs7194309  | 16 | 54268659  | T | C | 1  | M | Y | N | N |         | D |                    | 8.416534  | 1.178086  | 1  |    |
| rs7200935  | 16 | 69564497  | T | C | 1  | F | N | Y | N |         | D |                    | 0.195997  | 0.000287  | 1  |    |
| rs7219550  | 17 | 7401671   | G | A | 1  | M | Y | N | N |         | D |                    | 0.271946  | 0.053604  | 1  |    |
| rs16972050 | 17 | 34463094  | T | C | 1  | M | Y | Y | Y | TOsgP   | D |                    | 7.809958  | 0.988192  | 1  |    |
| rs1052169  | 17 | 43189049  | T | G | 1  | F | Y | Y | N |         | L |                    | 0.885387  | 1.508172  | 1  |    |
| rs2074405  | 17 | 44866001  | C | A | 1  | F | Y | Y | Y | TRsSGP  | D |                    | 11.074544 | 18.713073 | 1  |    |
| rs8081659  | 17 | 27213990  | C | T | 1  | M | Y | N | Y |         | D |                    | 0.612237  | 1.617896  | 1  |    |
| rs1540038  | 18 | 47182569  | C | T | 1  | F | N | N | Y |         | L | Tract              | 6.909134  | 9.075234  | 0  |    |
| rs1943969  | 18 | 47182838  | C | T | 1  | F | Y | N | N |         | L | Tract              | 6.861498  | 9.380396  | 1  |    |
| rs2276186  | 18 | 48327815  | A | G | 1  | F | Y | Y | Y | TRSgP   | L |                    | 16.465994 | 17.600995 | 1  |    |
| rs7243833  | 18 | 57322606  | G | A | 1  | F | N | Y | N |         | D |                    | 4.964306  | 2.961244  | 1  |    |
| rs12954548 | 18 | 62305405  | G | T | 1  | M | N | Y | N | TOSGP   | D | Tract              | 1.032678  | 0.139324  | 1  |    |
| rs6566131  | 18 | 62306527  | T | C | 1  | M | N | Y | N | TOSGP   | D | Tract              | 1.021140  | 0.006783  | 0  |    |
| rs872664   | 19 | 6311818   | G | A | 1  | F | Y | N | Y |         | D |                    | 17.714512 | 7.606549  | 1  |    |
| rs929777   | 19 | 47222310  | G | A | 1  | M | Y | Y | Y | TSSSGP  | D |                    | 0.342496  | 0.025617  | 1  |    |
| rs1716274  | 19 | 49706736  | T | G | 1  | F | Y | Y | Y | TORSSGP | L |                    | 7.086865  | 2.434152  | 1  |    |
| rs11881919 | 19 | 56978525  | T | G | 1  | M | Y | Y | Y |         | D |                    | 1.391946  | NA        | 1  |    |
| rs10485487 | 20 | 5378864   | G | A | 1  | M | Y | N | N | xTOrSSG | D |                    | 19.791516 | 18.456969 | 1  |    |
| rs6012200  | 20 | 36067873  | G | A | 1  | F | Y | N | N | TORSSGP | L |                    | 14.099518 | 11.809377 | 1  |    |
| rs3787412  | 20 | 60481054  | C | A | 1  | F | Y | Y | Y | TORs    | D | NCO cluster        | 0.521299  | NA        | 1  |    |
| rs4925209  | 20 | 60511734  | A | G | 1  | F | Y | Y | N | TOs     | D | NCO cluster, Tract | 2.003385  | NA        | 1  |    |
| rs4925323  | 20 | 60511737  | T | C | 1  | F | Y | Y | N | TOs     | D | NCO cluster, Tract | 2.002826  | NA        | 0  |    |
| rs4925325  | 20 | 60514224  | G | A | 1  | F | Y | Y | N | TORs    | D | NCO cluster, Tract | 1.539834  | NA        | 0  |    |
| rs2051186  | 21 | 33538498  | G | A | 1  | M | N | N | Y |         | D |                    | 3.726848  | 2.741755  | 1  |    |
| rs174345   | 22 | 18033199  | A | G | 1  | M | Y | N | Y |         | L |                    | 3.261495  | NA        | 1  |    |
| rs467504   | 22 | 18583267  | C | T | .5 | F | N | N | N |         | L | CO cluster         | A         | 0.350970  | NA | .5 |
| rs468789   | 22 | 18586169  | T | C | .5 | F | Y | Y | N |         | L | CO cluster         | B         | 0.376600  | NA | .5 |

|          |    |          |   |   |   |   |   |   |   |      |   |  |          |          |   |
|----------|----|----------|---|---|---|---|---|---|---|------|---|--|----------|----------|---|
| rs138054 | 22 | 44219572 | G | A | 1 | M | N | Y | Y | TOSG | D |  | 0.438627 | 0.081416 | 1 |
|----------|----|----------|---|---|---|---|---|---|---|------|---|--|----------|----------|---|

**Table S1. Listing of identified gene conversion sites.** SNP gives the rs id from dbSNP for each site. Chrom and position give the chromosome and physical position in GRCh37 coordinates as determined by aligning probe sequences to the reference genome. A1 and A2 are the two alleles for the SNP. Rate count gives the weight that the SNP was assigned for computing the rate of gene conversion genome-wide. SNPs with rate count of .5 are ambiguous (see Methods), and SNPs with rate count of 0 were ascertained differently than the informative sites and therefore do not contribute to the rate calculation. Sex lists the sex of the transmitting parent (M for male, F for female). “Recipient het” indicates whether the recipient of the gene conversion is heterozygous (Y for yes, N for no). “Other parent het” indicates whether the other parent (i.e., the partner of the transmitting parent) is heterozygous. Validation indicates how the site was validated. Blank entries indicate that data were not available and validation was not attempted. For non-blank entries, we use the following abbreviations to list the individuals examined for validation: T for the transmitting parent, O for the other parent, R for the gene conversion recipient, S for sibling (upper case S indicates that the sibling received the allele that was putatively gene converted; lower case s indicates the sibling received the non-gene converted allele), G for grandchild (upper case G indicates the grandchild received the gene converted allele, lower case g indicates the grandchild received the non-gene converted allele), P for partner of the recipient, and x indicates that there is a mismatch, with either a lowercase t for a mismatch in the transmitting parent, or a lowercase r for a mismatch in the recipient of the gene conversion. For the site whose validation status is listed as “No call,” sequence data are available for relevant samples, but no genotype calls exist at the position. SNP density is either D for the high SNP density dataset or L for the low SNP density dataset. Type indicates whether the gene conversion site was part of a tract, a crossover (CO) cluster event (also referred to as complex crossover), a non-crossover (NCO) cluster event (which we refer to a clustered gene conversion in the paper text); some events are part of a cluster and a tract. Blank type fields indicate a gene conversion site identified in isolation of other nearby recombination events. CO strand indicates, for crossover cluster events, the relative strand that an event falls on; strands are arbitrarily labeled ‘A’ and ‘B’. HapMap2 and deCODE rate columns give the recombination and crossover rates, respectively from the two maps described in the text. Some sites do not have a rate reported in the deCODE map and are listed as NA. Hotspot count indicates how the site was counted in order to calculate the number of sites that fall in crossover hotspots (see Methods); we count only one site per tract for this purpose.
